# Supplementary material
Source: publisher site journal article supplement (https://www.dovepress.com/article/364736)
Supplement: Supplementary file 1 [file get_supplementary_file.php]

**Supplementary materials**

|  |  |
| --- | --- |
|  |  |
|  |  |
|  |  |
|  |  |
|  |  |

**Figure S1.** Standard curve for ELISA assay of human neuroglobin (NGB) (pg/mL)

**Figure S2.** Standard curve for ELISA assay of human ubiquitin carboxyl terminal hydrolase L1 (UCHL1) (pg/mL).
